# Supplementary material
Source: PubMed Central journal article supplement (PMC3748979)
Supplement: jbjs_95_8_694_ds01.pdf [file jbjs_95_8_694_ds01.pdf]

TABLE E-1 Radiographic Scores and Healing Rates in Study 1 and Study 2 at Twelve Weeks

| Groups                                | Healing Rate<br>(no. healed/total no.) | Radiographic Score* |
|---------------------------------------|----------------------------------------|---------------------|
| Study 1                               |                                        |                     |
| Control                               | 0/15                                   | 2.9 ± 0.8           |
| Continuous (0-12 wk) Scl-Ab treatment | 4/15                                   | 3.8 ± 0.8†          |
| Early (0-2 wk) Scl-Ab treatment       | 3/15                                   | 3.4 ± 0.9           |
| Delayed (2-4 wk) Scl-Ab treatment     | 4/15                                   | 3.5 ± 0.9           |
| Study 2                               |                                        |                     |
| Control                               | 0/15                                   | 2.4 ± 0.7           |
| Continuous (0-12 wk) Scl-Ab treatment | 0/15                                   | 3.2 ± 0.8‡          |

\*The values are given as the mean and the standard deviation. †P < 0.05 vs. control in Study 1. ‡P = 0.0038 vs. control in Study 2.

TABLE E-2 Micro-CT Analysis of the Femoral Defects in Study 1 and Study 2 at Twelve Weeks

| Groups                                | Bone Volume*<br>(mm <sup>3</sup> ) | Bone Volume Fraction*<br>(%) |
|---------------------------------------|------------------------------------|------------------------------|
| Study 1                               |                                    |                              |
| Control                               | 18.3 ± 8.6                         | 39.3 ± 15.3                  |
| Continuous (0-12 wk) Scl-Ab treatment | 29.7 ± 11.2                        | 60 ± 17†                     |
| Early (0-2 wk) Scl-Ab treatment       | 22.7 ± 14.8                        | 44.4 ± 20                    |
| Delayed (2-4 wk) Scl-Ab treatment     | 25.7 ± 16.5                        | 49.6 ± 20.4                  |
| Study 2                               |                                    |                              |
| Control                               | 8.5 ± 3.3                          | 19.2 ± 9.5                   |
| Continuous (0-12 wk) Scl-Ab treatment | 17.6 ± 7.4‡                        | 37.4 ± 0.1‡                  |

\*The values are given as the mean and the standard deviation. †P < 0.05 vs. control in Study 1. ‡P < 0.001 vs. control in Study 2.

TABLE E-3 Histomorphometric Analysis

| Groups                                | Bone Area*<br>(mm <sup>2</sup> ) | Bone Area/Tissue Area*<br>(%) |
|---------------------------------------|----------------------------------|-------------------------------|
| Study 1                               |                                  |                               |
| Control                               | 30.3 ± 8.8                       | 37.3 ± 10.2                   |
| Continuous (0-12 wk) Scl-Ab treatment | 46.8 ± 16.2                      | 44.4 ± 9.1                    |
| Early (0-2 wk) Scl-Ab treatment       | 31.4 ± 20.1                      | 33.5 ± 13.5                   |
| Delayed (2-4 wk) Scl-Ab treatment     | 36 ± 17.4                        | 40.4 ± 15                     |
| Study 2                               |                                  |                               |
| Control                               | 13.1 ± 9.6                       | 15.2 ± 9.1                    |
| Continuous (0-12 wk) Scl-Ab treatment | 38.6 ± 23.8                      | 28.2 ± 10.9                   |

\*The values are given as the mean and the standard deviation. No significant difference was detected between the controls and Scl-Ab groups in Study 1 and Study 2.
